# Supplementary material
Source: publisher figshare collection journal article supplement (https://tandf.figshare.com/ndownloader/files/19798541)
Supplement: Supplementary file 1 [file 19798541]

## Sheet: Hoja1
	Supplementary material, Table S1. Demographic, epidemiological and vaccine-related characteristics of the strains included in the study.
	REF. STRAIN	DATE	GENDER	AGE	PERTUSSIS VACCINE DOSES RECEIVED	DATE OF LAST PERTUSSIS VACCINE DOSE	PFGE profile	MT	ptxA	ptxP	prn	fim3	Serotype
	BP1	19.09.1986	UNK	UNK	UNK	NA	VH1						FIM3
	BP2	02.01.1986	UNK	UNK	UNK	NA	VH2	27	1	1	2	1	FIM2/3
	BP3	16.03.1987	UNK	UNK	UNK	NA	VH3	70	1	1	1	1	FIM3
	BP4	04.12.1986	UNK	UNK	UNK	NA	VH1	95	1	1	1	1	FIM3
	BP5	26.03.1987	UNK	UNK	UNK	NA	VH4	158	1	1	2	1	FIM3
	BP6	25.04.1989	F	UNK	UNK	NA	VH5	133	1	1	1	1	FIM2
	BP7	12.05.1989	F	1M	UNK	NA	VH6	135	1	1	1	1	FIM2
	BP8	07.06.1989	M	4M	UNK	NA	VH7	146	1	1	1	1	FIM3
	BP9	25.06.1989	M	3M	UNK	NA	VH5						FIM2/3
	BP10	09.05.1989	M	1M	UNK	NA	VH6						FIM2
	BP11	12.05.1989	F	2M	UNK	NA	VH8	27	1	1	3	1	FIM2
	BP12	12.05.1989	M	1M	UNK	NA	VH6						FIM2
	BP13	09.06.1989	M	4M	UNK	NA	VH9	70	1	5	3	1	FIM2
	BP14	14.06.1989	M	1M	UNK	NA	VH10	70	1	1	3	1	FIM3
	BP15	28.06.1989	F	3M	UNK	NA	VH11	27	1	1	2	1	FIM2
	BP16	30.06.1989	M	2M	UNK	NA	VH8						FIM2
	BP17	22.06.1989	F	1M	UNK	NA	VH5		1	1	1	1	FIM2/3
	BP18	09.06.1989	F	1M	UNK	NA	VH12	28	1	1	1	1	FIM2
	BP19	06.07.1989	F	3M	UNK	NA	VH5						FIM2/3
	BP20	10.07.1989	M	2M	UNK	NA	VH2		1	1	2	1	FIM3
	BP21	18.07.1989	F	1M	UNK	NA	VH2						FIM2
	BP22	19.07.1989	F	3M	UNK	NA	VH8						FIM2
	BP23	19.07.1989	F	9Y	UNK	NA	VH5						FIM3
	BP24	20.07.1989	F	1M	UNK	NA	VH13	16	1	10	3	1	FIM2
	BP25	27.07.1989	M	1M	UNK	NA	VH2						FIM3
	BP26	28.07.1989	M	UNK	UNK	NA	VH14		1	1	2	1	FIM3
	BP27	15.08.1989	F	UNK	UNK	NA	VH8						FIM2
	BP28	29.08.1989	F	2M	UNK	NA	VH8						FIM2
	BP29	29.08.1989	M	2M	UNK	NA	VH2	27	1	1	2	1	FIM2
	BP30	10.08.1989	F	3M	UNK	NA	VH5						FIM2
	BP31	13.08.1989	F	1M	UNK	NA	VH2						FIM3
	BP32	26.08.1989	M	3M	UNK	NA	VH5						FIM2/3
	BP33	30.09.1989	F	3Y	UNK	NA	VH2						FIM3
	BP34	02.09.1989	F	1M	UNK	NA	VH5						FIM2
	BP37	22.01.1990	M	3M	UNK	NA	VH15	70	1	1	1	1	FIM3
	BP38	30.01.1990	F	UNK	UNK	NA	VH16	70	1	1	1	1	FIM2/3 negative
	BP39	09.09.1989	M	1M	UNK	NA	VH2						FIM3
	BP40	28.09.1989	F	5M	UNK	NA	VH6		1	1	1	1	FIM2
	BP41	16.09.1989	M	6M	UNK	NA	VH14	27	1	1	2	1	FIM3
	BP42	21.10.1989	M	13Y	UNK	NA	VH2						FIM3
	BP43	27.12.1989	F	1M	UNK	NA	VH2						FIM3
	BP44	09.01.1990	F	1M	UNK	NA	VH5						FIM2
	BP45	31.07.1990	F	UNK	UNK	NA	VH2						FIM3
	BP46	17.08.1990	M	2M	UNK	NA	VH5		1	1	1	1	FIM3
	BP47	08.05.1992	F	3M	UNK	NA	VH2		1	1	3	1	FIM2/3
	BP48	28.06.1992	M	7M	UNK	NA	VH8						FIM3
	BP49	04.07.1992	F	4M	UNK	NA	VH12		1	1	3	1	FIM3
	BP50	15.07.1992	M	2M	UNK	NA	VH12						FIM3
	BP51	28.07.1992	M	4M	UNK	NA	VH8						FIM3
	BP52	04.08.1992	M	5M	UNK	NA	VH2		1	1	2	1	FIM3
	BP53	04.08.1992	F	5M	UNK	NA	VH8	16	1	1	1	1	FIM3
	BP54	17.08.1992	F	UNK	UNK	NA	VH12						FIM3
	BP55	27.08.1992	M	10M	UNK	NA	VH17	16	1	1	1	1	FIM3
	BP56	30.08.1992	M	7M	UNK	NA	VH2						FIM2/3
	BP57	30.08.1992	F	89Y	UNK	NA	VH12						FIM3
	BP58	19.09.1992	F	1M	UNK	NA	VH12	158	1	1	2	1	FIM2
	BP59	11.12.1992	F	1M	UNK	NA	VH7	27	1	1	2	1	FIM2
	BP61	24.06.1994	M	UNK	UNK	NA	VH7						FIM2/3
	BP62	14.09.1994	M	2M	UNK	NA	VH8						FIM3
	BP63	19.09.1994	F	6Y	UNK	NA	VH8						FIM2
	BP64	20.09.1994	F	2Y	UNK	NA	VH2						FIM2
	BP65	28.09.1994	M	3M	UNK	NA	VH7		1	1	1	1	FIM3
	BP66	14.07.1995	M	3M	UNK	NA	VH8		1	1	1	1	FIM3
	BP67	17.08.1995	M	3M	UNK	NA	VH8						FIM3
	BP68	27.09.1995	M	UNK	UNK	NA	VH5	32	1	1	3	1	FIM3
	BP69	30.09.1995	F	5M	UNK	NA	VH5		1	1	1	1	FIM3
	BP70	18.08.1996	F	4M	UNK	NA	VH18	28	1	3	2	1	FIM3
	BP71	22.05.1996	F	2M	UNK	NA	VH2		1	11	2	1	FIM3
	BP72	31.05.1996	M	5M	UNK	NA	VH1						FIM3
	BP73	17.03.1996	F	5M	UNK	NA	VH8						FIM3
	BP74	13.06.1996	F	8M	UNK	NA	VH18						FIM3
	BP75	14.03.1997	M	3M	UNK	NA	VH8	60	1	1	3	1	FIM3
	BP76	09.06.1997	F	4M	UNK	NA	VH2						FIM3
	BP77	07.07.1997	M	1M	UNK	NA	VH12						FIM2
	BP78	07.07.1997	F	2M	UNK	NA	VH7	95	1	1	1	1	FIM2
	BP79	12.07.1997	F	3M	UNK	NA	VH7						FIM3
	BP80	08.08.1997	M	UNK	UNK	NA	VH20	95	1	1	2	1	FIM3
	BP81	19.08.1997	M	3M	UNK	NA	VH2						FIM3
	BP82	27.08.1997	F	4M	UNK	NA	VH12						FIM2
	BP83	27.08.1997	F	1M	UNK	NA	VH12	60	1	3	2	1	FIM3
	BP85	02.12.1997	M	1M	UNK	NA	VH12						FIM3
	BP86	11.12.1997	M	UNK	UNK	NA	VH2	27	1	1	2	1	FIM3
	BP87	21.11.1998	F	7Y	UNK	NA	VH19	27	1	3	2	2	FIM3
	BP88	04.12.1998	UNK	1M	UNK	NA	VH19						FIM3
	BP89	14.01.1999	M	3M	UNK	NA	VH20						FIM3
	BP90	15.01.1999	M	2M	UNK	NA	VH21	28	1	3	2	1	FIM2/3
	BP91	18.01.1999	M	7Y	UNK	NA	VH20						FIM3
	BP92	25.02.1999	F	5M	UNK	NA	VH8	60	1	1	3	1	FIM3
	BP93	13.06.1999	F	6Y	UNK	NA	VH19						FIM3
	BP94	07.07.1999	M	13Y	UNK	NA	VH2						FIM3
	BP95	10.07.1999	F	1M	UNK	NA	VH2	60	1	3	2	1	FIM3
	BP96	17.07.1999	M	5M	UNK	NA	VH23						FIM3
	BP97	31.07.1999	M	2M	UNK	NA	VH8						FIM3
	BP98	09.08.1999	M	6Y	UNK	NA	VH19						FIM3
	BP99	10.08.1999	F	8M	UNK	NA	VH20	27	1	3	2	2	FIM3
	BP100	11.08.1999	F	1M	UNK	NA	VH24						FIM2/3 negative
	BP101	16.10.1999	M	5M	UNK	NA	VH20						FIM3
	BP102	25.10.1999	F	UNK	UNK	NA	VH20						FIM3
	BP103	24.01.2000	M	2M	UNK	NA	VH20						FIM3
	BP104	01.02.2000	M	1M	0	NA	VH19						FIM3
	BP105	23.02.2000	M	1M	0	NA	VH24						FIM3
	BP106	02.03.2000	F	2M	UNK	NA	VH19						FIM3
	BP107	20.03.2000	M	1M	0	NA	VH19						FIM3
	BP108	21.03.2000	F	1M	0	NA	VH20						FIM3
	BP109	25.01.2000	M	15D	0	NA	VH20						FIM3
	BP111	28.04.2000	UNK	UNK	UNK	NA	VH20						FIM3
	BP112	28.04.2000	M	2M	0	NA	VH20						FIM3
	BP113	08.05.2000	F	7Y	5	02.07.1998	VH20						FIM3
	BP114	18.05.2000	F	UNK	UNK	NA	VH20						FIM3
	BP115	16.05.2000	F	UNK	UNK	NA	VH20						FIM3
	BP116	16.05.2000	F	8Y	UNK	NA	VH19						FIM3
	BP117	21.05.2000	M	3M	UNK	NA	VH19						FIM3
	BP118	22.05.2000	M	1M	0	NA	VH19						FIM3
	BP119	31.05.2000	M	1M	0	NA	VH20						FIM3
	BP120	02.06.2000	M	3M	UNK	NA	VH19						FIM3
	BP121	13.06.2000	F	2M	1	07.06.2000	VH20						FIM3
	BP122	15.06.2000	M	6M	2	22.04.2000	VH20						FIM3
	BP123	16.06.2000	M	7Y	5	02.06.1998	VH19						FIM3
	BP124	15.06.2000	M	7Y	5	10.10.1998	VH20						FIM3
	BP125	14.06.2000	M	14Y	UNK	NA	VH19						FIM3
	BP126	16.06.2000	F	4M	2	30.05.2000	VH20						FIM3
	BP127	19.06.2000	M	1Y	2	28.05.1999	VH20	27	1	3	2	2	FIM3
	BP128	20.06.2000	M	10Y	UNK	NA	VH19						FIM3
	BP129	23.06.2000	M	7Y	UNK	NA	VH19						FIM3
	BP130	23.06.2000	F	UNK	UNK	NA	VH19						FIM3
	BP131	23.06.2000	F	4Y	UNK	NA	VH19						FIM3
	BP132	29.06.2000	F	2M	1	21.06.2000	VH20						FIM2/3
	BP133	29.06.2000	M	1M	0	NA	VH19						FIM3
	BP134	01.07.2000	F	2M	0	NA	VH19						FIM3
	BP135	01.07.2000	M	UNK	UNK	NA	VH19						FIM3
	BP137	03.07.2000	F	3Y	3	17.09.1997	VH20						FIM3
	BP138	09.07.2000	F	4M	2	29.06.2000	VH24						FIM3
	BP139	07.07.2000	F	2M	0	NA	VH20						FIM3
	BP140	12.07.2000	M	3M	UNK	NA	VH22	27	1	3	2	2	FIM3
	BP141	14.07.2000	M	6Y	5	05.11.1998	VH20						FIM3
	BP142	19.07.2000	M	1M	0	NA	VH20						FIM3
	BP143	27.07.2000	M	3M	0	NA	VH20						FIM3
	BP144	29.07.2000	F	1Y	3	13.09.1999	VH19						FIM3
	BP145	02.08.2000	F	3Y	4	15.04.1998	VH24	27	1	3	2	2	FIM3
	BP146	03.08.2000	F	3M	UNK	NA	VH19						FIM3
	BP147	01.08.2000	M	2M	0	NA	VH19	158	1	3	2	2	FIM3
	BP148	12.08.2000	M	4Y	4	20.06.1997	VH19						FIM3
	BP149	15.08.2000	F	2M	1	13.07.2000	VH20						FIM3
	BP150	15.08.2000	M	1M	0	NA	VH5	27	1	1	1	1	FIM3
	BP151	19.08.2000	M	1M	0	NA	VH20						FIM3
	BP152	31.08.2000	M	4Y	4	25.09.1997	VH24						FIM3
	BP154	02.03.2002	F	4M	UNK	NA	VH23	27	1	3	2	1	FIM3
	BP155	03.08.2002	M	1Y	3	26.10.2001	VH20						FIM3
	BP157	23.08.2002	M	2M	1	31.07.2002	VH19						FIM3
	BP158	07.11.2002	F	UNK	UNK	NA	VH19						FIM3
	BP159	08.01.2003	M	UNK	UNK	NA	VH19	27	1	3	2	2	FIM3
	BP160	30.01.2003	F	6M	3	19.01.2003	VH20	27	1	3	2	2	FIM2/3
	BP161	19.03.2003	UNK	UNK	UNK	NA	VH12	60	1	3	2	1	FIM3
	BP162	18.03.2003	M	2M	0	NA	VH2	27	1	3	2	1	FIM3
	BP163	30.04.2003	M	2M	UNK	NA	VH19						FIM3
	BP164	07.05.2003	M	UNK	UNK	NA	VH8	27	1	3	2	2	FIM2/3 negative
	BP165	22.05.2003	F	6Y	UNK	NA	VH19						FIM2/3 negative
	BP166	23.05.2005	M	39Y	UNK	NA	VH19						FIM2/3 negative
	BP167	03.06.2003	M	UNK	UNK	NA	VH20						FIM2/3 negative
	BP168	17.06.2003	F	UNK	UNK	NA	VH19						FIM3
	BP169	17.06.2003	F	UNK	UNK	NA	VH23						FIM3
	BP171	21.06.2003	F	UNK	UNK	NA	VH19						FIM3
	BP172	29.06.2003	F	32Y	UNK	NA	VH23						FIM3
	BP173	03.07.2003	F	UNK	UNK	NA	VH19						FIM3
	BP289	01.03.2007	F	1M	0	NA	VH19		1	3	2	2	FIM3
	BP291	15.03.2007	M	1M	0	NA	VH19	27	1	3	2	2	FIM3
	BP298	03.05.2007	F	1M	0	NA	VH25		1	3	2	2	FIM3
	BP299	09.05.2007	UNK	1M	0	NA	VH19		1	3	2	2	FIM3
	BP302	22.05.2007	M	1M	0	NA	VH19		1	3	2	2	FIM3
	BP303	22.05.2007	M	2M	1	04.05.2007	VH25		1	3	2	2	FIM2/3 negative
	BP304	29.05.2007	F	15Y	UNK	NA	VH19		1	15	2	2	FIM3
	BP309	21.06.2007	F	15Y	UNK	NA	VH19		1	15	2	2	FIM3
	BP310	18.06.2007	F	1M	0	NA	VH2		1	3	2	1	FIM3
	BP311	22.06.2007	F	UNK	UNK	NA	VH19		1	3	2	2	FIM3
	BP312	18.06.2007	F	48Y	UNK	NA	VH2		1	3	2	2	FIM3
	BP313	21.06.2007	M	15Y	4	05.08.1993	VH19		1	15	2	2	FIM3
	BP315	03.07.2007	F	UNK	UNK	NA	VH19		1	15	2	2	FIM2/3 negative
	BP317	19.07.2007	F	2M	0	NA	VH19		1	3	2	2	FIM3
	BP318	25.07.2007	M	13Y	UNK	NA	VH22		1	3	2	2	FIM3
	BP319	03.08.2007	F	1M	0	NA	VH2		1	3	2	2	FIM3
	BP320	13.08.2007	M	UNK	UNK	NA	VH19		1	3	2	2	FIM3
	BP321	25.08.2007	F	2M	0	NA	VH26		1	3	2	1	FIM2/3 negative
	BP323	29.08.2007	F	12Y	UNK	NA	VH19		1	3	2	2	FIM3
	BP324	29.08.2007	F	UNK	UNK	NA	VH20		1	3	2	2	FIM3
	BP325	29.08.2007	F	1Y	UNK	NA	VH26	27	1	3	2	1	FIM3
	BP326	03.09.2007	M	2Y	UNK	NA	VH19		1	3	2	2	FIM3
	BP327	10.09.2007	F	3Y	UNK	NA	VH26		1	3	2	1	FIM3
	BP328	10.09.2007	F	4Y	UNK	NA	VH19		1	3	2	2	FIM3
	BP329	21.09.2007	F	1M	0	NA	VH2		1	3	2	2	FIM3
	BP331	03.10.2007	M	5Y	4	19.05.2004	VH22		1	3	2	2	FIM3
	BP332	21.10.2007	F	UNK	UNK	NA	VH19		1	3	2	2	FIM3
	BP335	22.04.2008	F	1Y	UNK	NA	VH36		1	3	2	1	FIM3
	BP337	08.05.2008	F	24D	0	NA	VH2		1	3	2	1	FIM3
	BP339	23.06.2008	F	2Y	4	07.03.2007	VH27	27	1	3	2	2	FIM2/3 negative
	BP340	28.06.2008	F	1M	0	NA	VH19		1	3	2	2	FIM3
	BP341	02/07/2008	F	14Y	5	07.05.1999	VH19		1	3	2	2	FIM3
	BP343	05.07.2008	M	26D	0	NA	VH19		1	3	2	2	FIM2/3 negative
	BP344	06.07.2008	F	2M	1	19.06.2008	VH22	27	1	3	2	2	FIM3
	BP346	23.07.2008	M	2M	1	10.07.2008	VH19		1	3	3	2	FIM3
	BP352	06.08.2008	F	UNK	UNK	NA	VH25	101	1	3	2	2	FIM3
	BP353	13.08.2008	F	1M	0	NA	VH20	27	1	3	2	2	FIM3
	BP354	16.08.2008	F	8M	3	20.06.2008	VH19		1	3	2	2	FIM3
	BP357	26.08.2008	F	4Y	4	06.10.2005	VH2		1	3	2	1	FIM3
	BP358	28.08.2008	M	5Y	4	05.11.2004	VH19		1	3	2	2	FIM3
	BP360	25.08.2008	F	3Y	4	05.02.2007	VH19		1	3	2	2	FIM3
	BP362	30.08.2008	F	3M	1	13.07.2008	VH20		1	3	2	2	FIM3
	BP363	09.09.2008	F	4M	UNK	NA	VH19		1	3	2	2	FIM3
	BP364	11.09.2008	M	1M	0	NA	VH2	101	1	3	2	1	FIM3
	BP365	23.09.2008	M	3M	1	18.08.2008	VH19		1	3	2	2	FIM3
	BP367	15.10.2008	F	1M	0	NA	VH22		1	3	2	2	FIM3
	BP368	29.01.2009	M	2M	UNK	NA	VH26		1	3	2	1	FIM3
	BP369	30.01.2009	F	17D	0	NA	VH19		1	3	2	2	FIM3
	BP370	01.03.2009	M	1M	0	NA	VH2		1	3	2	2	FIM3
	BP371	11.05.2009	M	UNK	UNK	NA	VH19		1	3	2	2	FIM3
	BP373	04.06.2009	F	32Y	UNK	NA	VH22		1	3	2	2	FIM3
	BP375	15.06.2009	M	3Y	4	03.01.2008	VH19		1	3	2	2	FIM3
	BP379	09.07.2009	M	3M	1	18.05.2009	VH25		1	3	2	2	FIM3
	BP380	14.07.2009	F	14Y	5	27.09.2001	VH25		1	3	2	2	FIM3
	BP381	31.07.2009	M	2M	1	06.07.2009	VH19		1	3	2	2	FIM3
	BP382	16.08.2009	F	1M	0	NA	VH20		1	3	2	2	FIM3
	BP383	23.08.2009	F	1M	0	NA	VH28	27	1	3	2	2	FIM3
	BP384	09.09.2009	M	3M	1	10.08.2009	VH19		1	3	2	2	FIM3
	BP387	22.01.2010	F	1M	0	NA	VH19		1	3	2	2	FIM3
	BP388	29.01.2010	F	UNK	UNK	NA	VH19		1	3	2	2	FIM3
	BP389	22.02.2010	F	UNK	UNK	NA	VH26		1	3	2	1	FIM2
	BP390	29.04.2010	F	2M	1	23.04.2010	VH20		1	3	2	2	FIM3
	BP392	30.06.2010	M	3M	1	25.05.2010	VH19		1	3	2	2	FIM3
	BP395	05.07.2010	M	2M	0	NA	VH19		1	3	2	2	FIM3
	BP398	19.07.2010	M	UNK	UNK	NA	VH19		1	3	2	2	FIM3
	BP399	22.07.2010	M	1M	0	NA	VH22		1	3	2	2	FIM3
	BP400	20.07.2010	F	1Y	3	01.09.2009	VH26		1	3	2	1	FIM3
	BP401	28.07.2010	M	14Y	5	16.10.2001	VH32	27	1	3	2	2	FIM3
	BP405	14.09.2010	M	1M	0	NA	VH26		1	3	2	1	FIM2
	BP406	23.09.2010	F	UNK	UNK	NA	VH29	27	1	3	2	2	FIM3
	BP423	02.05.2011	M	8Y	5	17.09.2009	VH19		1	3	2	2	FIM3
	BP424	03.05.2011	F	33Y	UNK	NA	VH26		1	3	2	1	FIM2
	BP425	12.05.2011	F	3M	1	24.03.2011	VH26		1	3	2	1	FIM2
	BP427	13.05.2011	M	8Y	5	27.11.2007	VH2		1	3	2	1	FIM3
	BP428	12.05.2011	F	49Y	UNK	NA	VH22	27	1	3	2	2	FIM3
	BP429	19.05.2011	M	3M	2	09.05.2011	VH19		1	3	2	2	FIM3
	BP432	18.05.2011	M	2Y	4	13.10.2010	VH19		1	3	2	2	FIM3
	BP433	26.05.2011	M	9Y	5	17.05.2007	VH19		1	3	2	2	FIM3
	BP434	27.05.2011	F	6Y	5	17.09.2010	VH30	27	1	3	2	2	FIM3
	BP435	31.05.2011	M	10Y	5	14.04.2005	VH30		1	3	2	2	FIM3
	BP436	01.06.2011	M	3M	1	08.04.2011	VH19		1	3	2	2	FIM3
	BP437	03.06.2011	M	3Y	4	07.08.2009	VH26		1	3	2	1	FIM3
	BP438	06.06.2011	M	11Y	1	14.02.2005	VH31	27	1	3	2	1	FIM3
	BP441	20.06.2011	M	2Y	3	05.02.2009	VH2		1	3	2	1	FIM3
	BP442	27.06.2011	F	7Y	5	11.07.2007	VH30		1	3	2	2	FIM3
	BP445	04.07.2011	M	5Y	4	22.11.2007	VH2		1	3	2	1	FIM3
	BP446	08.07.2011	M	1M	0	NA	VH19		1	3	2	2	FIM3
	BP447	06.07.2011	F	12Y	5	05.11.2004	VH32		1	3	2	2	FIM3
	BP448	05.07.2011	F	61Y	UNK	NA	VH26		1	3	2	1	FIM2
	BP450	14.07.2011	F	1Y	3	24.08.2010	VH26		1	3	2	1	FIM2
	BP451	14.07.2011	F	53Y	UNK	NA	VH19		1	3	2	2	FIM3
	BP452	12.07.2011	F	1Y	3	22.09.2010	VH26		1	3	2	1	FIM3
	BP455	21.07.2011	M	4M	2	27.06.2011	VH26		1	3	2	1	FIM2
	BP456	21.07.2011	M	1M	0	NA	VH2		1	3	2	1	FIM3
	BP457	18.07.2011	F	66Y	UNK	NA	VH2		1	3	2	1	FIM3
	BP458	22.07.2011	M	3Y	4	04.03.2009	VH26		1	3	2	1	FIM2
	BP461	22.07.2011	F	4Y	4	18.06.2008	VH19		1	3	9	2	FIM3
	BP462	25.07.2011	F	56Y	UNK	NA	VH2		1	3	2	1	FIM3
	BP463	24.07.2011	M	9Y	5	01.02.2006	VH33		1	3	2	1	FIM3
	BP464	29.07.2011	M	1Y	3	15.09.2010	VH22		1	3	2	2	FIM3
	BP465	27.07.2011	M	37Y	UNK	NA	VH2		1	3	2	1	FIM3
	BP466	27.07.2011	F	20Y	UNK	NA	VH19	27	1	3	2	2	FIM3
	BP467	27.07.2011	M	6Y	5	03.12.2008	VH26	28	1	3	2	1	FIM2
	BP469	01.08.2011	F	8Y	5	13.11.2007	VH31		1	3	2	1	FIM3
	BP471	01.08.2011	M	2M	1	12.07.2011	VH22		1	3	2	2	FIM3
	BP472	02.08.2011	M	1M	0	NA	VH2		1	3	2	1	FIM3
	BP474	03.08.2011	F	11M	3	16.02.2011	VH22	27	1	3	2	2	FIM3
	BP476	19.08.2011	F	5M	2	22.07.2011	VH26		1	3	2	1	FIM3
	BP477	25.08.2011	F	5M	2	22.08.2011	VH19		1	3	2	2	FIM3
	BP478	30.08.2011	F	2M	1	12.08.2011	VH2		1	3	2	1	FIM3
	BP482	14.09.2011	M	1Y	3	29.10.2010	VH22		1	3	2	2	FIM3
	BP483	13.09.2011	F	8M	3	17.06.2011	VH22		1	3	2	2	FIM3
	BP484	25.09.2011	M	1M	0	NA	VH2		1	3	2	1	FIM3
	BP491	16.12.2011	M	37Y	UNK	NA	VH26		1	3	2	2	FIM3
	BP492	16.01.2012	F	2M	0	NA	VH19		1	3	2	2	FIM3
	BP494	27.02.2012	F	12Y	5	26.04.2005	VH19		1	3	2	2	FIM3
	BP495	01.03.2012	F	23Y	UNK	NA	VH26		1	3	2	1	FIM3
	BP496	25.04.2012	M	43Y	UNK	NA	VH26		1	3	2	1	FIM3
	BP498	30.04.2012	M	1M	0	NA	VH26		1	3	2	1	FIM2
	BP502	24.05.2012	M	7Y	4	13.02.2008	VH2		1	3	2	1	FIM3
	BP503	01.07.2012	M	11Y	5	23.05.2008	VH2		1	3	2	1	FIM3
	BP505	03.07.2012	M	1Y	3	04.05.2011	VH31		1	3	2	1	FIM3
	BP507	13.07.2012	F	33Y	UNK	NA	VH19		1	3	2	2	FIM3
	BP508	18.07.2012	F	12Y	5	20.10.2005	VH2		1	3	2	1	FIM3
	BP509	27.07.2012	F	58Y	UNK	NA	VH2		1	3	2	1	FIM2
	BP510	28.07.2012	M	1Y	3	09.01.2012	VH22		1	3	2	2	FIM3
	BP511	06.08.2012	F	2Y	4	01.03.2011	VH26		1	3	2	1	FIM2
	BP512	14.08.2012	F	1Y	3	13.12.2011	VH33	27	1	3	2	1	FIM3
	BP513	16.08.2012	F	11Y	5	15.01.2008	VH26		1	3	2	1	FIM2
	BP514	30.08.2012	M	46Y	UNK	NA	VH2		1	3	2	1	FIM3
	BP515	03.09.2012	M	70Y	UNK	NA	VH26		1	3	2	1	FIM3
	BP517	27.09.2012	M	2M	0	NA	VH20	27	1	3	2	2	FIM3
	BP519	24.10.2012	F	1M	0	NA	VH26		1	3	2	1	FIM2
	BP520	26.10.2012	F	2M	0	NA	VH26		1	3	2	1	FIM2
	BP521	25.10.2012	M	2M	1	17.10.2012	VH31		1	3	2	2	FIM3
	BP522	15.11.2012	M	2M	0	NA	VH26		1	3	2	1	FIM2
	BP524	06.12.2012	F	7M	3	30.10.2012	VH37	28	1	3	2	2	FIM3
	BP525	24.01.2013	M	1M	0	NA	VH36	27	1	3	2	1	FIM2
	BP526	12.04.2013	M	2M	0	NA	VH26		1	3	2	1	FIM2
	BP528	15.05.2013	M	8M	0	NA	VH33		1	3	2	1	FIM3
	BP530	29.05.2013	M	2Y	2	15.05.2013	VH22		1	3	2	2	FIM3
	BP531	24.07.2013	F	4Y	0	NA	VH26		1	3	2	1	FIM2
	BP532	30.08.2013	M	1Y	3	04.02.2013	VH34	27	1	3	2	1	FIM2
	BP533	26.08.2013	M	3Y	4	03.02.2012	VH2		1	3	2	1	FIM2
	BP534	05.09.2013	M	1M	0	NA	VH26		1	3	2	1	FIM2
	BP535	05.09.2013	M	1Y	3	16.11.2012	VH2		1	3	2	1	FIM2
	BP536	09.09.2013	F	2M	0	NA	VH2		1	3	2	1	FIM2
	BP537	07.09.2013	M	1Y	3	17.06.2013	VH34		1	3	2	1	FIM2
	BP538	07.09.2013	M	10Y	5	17.06.2008	VH2	27	1	3	2	1	FIM2
	BP539	06.10.2013	M	2M	0	NA	VH26		1	3	2	1	FIM2
	BP540	16.12.2013	M	54Y	UNK	NA	VH26		1	3	2	1	FIM2
	BP541	10.02.2014	F	2M	1	13.01.2014	VH31		1	3	2	2	FIM3
	BP542	26.05.2014	M	10Y	5	20.07.2009	VH26		1	3	2	1	FIM2
	BP543	19.06.2014	M	2M	1	27.05.2014	VH35	30	1	3	1	1	FIM2
	BP545	12.08.2014	M	1M	0	NA	VH26		1	3	2	1	FIM2
	BP546	15.08.2014	F	5M	2	02.07.2014	VH26		1	3	2	1	FIM2
	BP547	18.08.2014	F	42Y	UNK	NA	VH26		1	3	2	1	FIM2
	BP551	23.09.2014	M	3Y	4	11.10.2012	VH2		1	3	2	1	FIM2
	BP552	03.10.2014	F	78Y	UNK	NA	VH38	27	1	3	9	2	FIM3
	BP553	31.03.2015	F	1M	0	NA	VH26	27	1	3	2	1	FIM2
	BP554	09.04.2015	F	1M	0	NA	VH2	27	1	3	2	1	FIM2
	BP555	18.04.2015	M	5M	2	03.03.2015	VH20	27	1	3	2	2	FIM3
	BP556	24.04.2015	M	7M	3	26.03.2015	VH26		1	3	2	1	FIM2
	BP557	26.04.2015	M	1Y	3	21.01.2015	VH19		1	3	2	2	FIM3
	BP558	13.05.2015	F	12Y	5	08.02.2008	VH26		1	3	2	1	FIM2
	BP559	21.05.2015	F	1M	0	NA	VH26		1	3	2	1	FIM2
	BP560	29.05.2015	M	1Y	3	08.10.2014	VH26		1	3	2	1	FIM2
	BP561	03.06.2015	F	1M	0	NA	VH2		1	3	2	1	FIM2
	BP562	17.06.2015	M	3Y	4	03.04.2013	VH26		1	3	2	1	FIM2
	BP563	16.06.2015	F	36Y	UNK	NA	VH19	27	1	3	2	2	FIM3
	BP564	25.06.2015	F	40Y	UNK	NA	VH26		1	3	2	1	FIM3
	BP565	20.07.2015	M	4Y	4	26.09.2012	VH19		1	3	2	2	FIM3
	BP567	28.07.2015	M	12Y	5	09.12.2008	VH36		1	3	2	1	FIM2
	BP568	26.08.2015	M	42Y	UNK	NA	VH2		1	3	2	1	FIM2
	BP569	21.09.2015	M	1M	0	NA	VH2		1	3	2	1	FIM2
	NA: not applicable
	UNK: unknown
